# Supplementary material for: Multitype Network-Guided Target Controllability in Phenotypically Characterized Osteosarcoma: Role of Tumor Microenvironment
Source: PubMed Central journal article supplement (PMC5536125; doi:10.3389/fimmu.2017.00918), 2017-07-31
Supplement: presentation_1.pdf [file presentation_1.pdf]

# **Multitype Network-guided Target Controllability in Phenotypically Characterized Osteosarcoma: role of Tumor Microenvironment**

## **SUPPLEMENTARY MATERIALS**

*Ankush Sharma,<sup>1,2</sup> Caterina Cinti<sup>1</sup> Enrico Capobianco<sup>1,2,3</sup>*

<sup>1</sup> Experimental Oncology Unit, UOS - Institute of Clinical Physiology, CNR - Siena (IT)

<sup>2</sup> Center for Computational Science, University of Miami, Miami - FL (USA)

<sup>3</sup> Miller School of Medicine, University of Miami, Miami - FL

*\*Corresponding author: [ecapobianco@med.miami.edu](mailto:ecapobianco@med.miami.edu).*

**Table of contents**

**Glossary: pg 2-3.**

**Supplementary text: pg 4-7.**

**Supplementary references: 7- 9**

**Supplementary Tables: pg 9-31.**

**Supplementary Figures: 32-38.**

## 1: Glossary of network terms.

**Network Adjacency Matrix.** The adjacency matrix  $A$  of a labeled graph is a matrix with rows and columns labeled by graph vertices, with a 1 or 0 for  $(v_i, v_j)$  according to whether  $v_i$  and  $v_j$  are adjacent or not (Weisstein, Wolfram Web Resource).

**Node Degree Distribution.** Measure that reflects the local connectivity of a node and indicates the number of connections with other nodes, and is the probability distribution of degrees over the whole network. Most real world networks exhibit the scale free property, and the degree distribution follows a power law.

$$D(i) = \sum_{j=1}^N a_{ij}$$

where  $a_{ij}$  is the generic element of  $A$ , and  $N$  is the total of nodes.

**Clustering Coefficient.** Is given by the proportions of links (interactions) between the neighbor nodes divided by the maximum possible connection with the neighborhood.

$$CC(i) = \frac{2e_i}{k_i(k_i - 1)}$$

where  $e_i$  is the number of edges between the neighbors of ' $i$ ', and  $k_i$  is the number of neighbors.

**Shortest Path length:** The shortest possible path (distance) between two nodes in a network. The shortest paths between all pairs of nodes are identified using the Dijkstra's algorithm (Dijkstra, 1959).

**Average path length:** Average of hops along the shortest paths for all pairs of nodes. It calculates the measure of efficiency of information. Most real world networks exhibits very short average path length, from which the small world concept comes (Watts and Strogatz, 1998;Freeman, 1977). Given the unweighted graph  $G$  of vertices  $V$ , let  $d(v_1, v_2)$ , (where  $v_1, v_2 \in V$  denote the shortest distance between  $v_1$  and  $v_2$ ). Assume that  $d(v_1, v_2) = 0$  if  $v_1 = v_2$  or  $v_2$  cannot be reached from  $v_1$ . Then, the average path length  $l_G$  is:

$$l_G = \frac{1}{n \cdot (n - 1)} \cdot \sum_{i,j} d(v_i, v_j)$$

Where  $n$  is the number of vertices in  $G$ .

**Network Diameter:** Longest shortest path length (maximum length of shortest paths) between two nodes in whole network. It can be simply detected after the calculation of shortest path lengths from every node to all other nodes: the longest of all calculated shortest path length is the diameter. Therefore, the network size.

**Betweenness centrality:** Global centrality measure computing the load placed on a given network node, or sum of the fraction of shortest paths between all pairs of nodes that traverse through node  $i$ . By (Freeman, 1977):

$$B(i) = \frac{1}{(N-1)(N-2)} \sum_{j \neq i \neq k} \frac{g_{JK}(i)}{g_{JK}}$$

where  $g_{jk}$  is the n. of shortest paths between nodes  $j$  and  $k$ , and  $g_{jk}(i)$  is the n. of these shortest paths traversing through node  $i$ .

**Closeness Centrality:** Global centrality metric used to determine critical nodes in networks and is defined as the inverse of farness, which in turn, is the sum of distances to all other nodes (Opsahl et al, 2010). It provides information on how fast information spreads from one particular node, say “ $S$ ”, to all other nodes sequentially. The closeness of node  $i$  is defined as inverse of average path length (shortest path) from node  $i$  to all other nodes in the network. The measure for the connected component is as follows:

$$C(i) = \frac{N-1}{\sum_{i \neq j} d_{ij}}$$

where  $d_{ij}$  is the shortest path from residue  $i$  to residue  $j$ , and  $N$  is the total number of nodes. (Guimera' et al, 2005) rewrote the equation as *the sum of inversed* distances to all other nodes as an alternative of the *inversed of the sum* of distances to all other nodes. The equation would then be:

$$Closeness(i) = \sum_j \frac{1}{d_{ij}}$$

**Modular overlap.** It is the participation of node  $i$  in effective number of modules  $a$

$$O[i] := n_a(\{d_i[a]\},$$

**Bridgeness measure :** For links it is referred as the bridge whose deletion would increase the number of components of the graph. This measure for node  $i$  between two ( $a$  and  $b$ ) or more modules relative to the other overlapping nodes can be computed as follows:

$$B[i] = \sum_{a=1}^m \sum_{b \neq a, b=1}^m B[a][b][i]$$

**Community centrality:**

$$O_{ij}(n) = 2 \frac{H_i(n)H_j(n)}{c(n)}$$

where module membership values  $H_i(n)$  and  $H_j(n)$  were normalized to the centrality and  $O_{ij}(n)$  is proportional to  $H_i(n)$  and  $H_j(n)$ , and  $c(n)$  is the centrality of node  $n$ , while the factor of 2 implies that bidirections are taken into account between the modules.

## 2: Node classification and annotation in phenotypic multitype OS Networks.

**Classification of Nodes:** Nodes have been classified into different types according to their pattern of intra- and inter-modular connectivity, thus offering a cartographic representation of networks and measuring through well-known participation coefficients (how much a node overlaps with different modules) and z-scores (how well connected a node is with other nodes in the module it belongs to) (Guimera' et al, 2007; Mihalik et al, 2011).

### Non-hub nodes:

1. **Ultra-peripheral:** with all their links within their module
2. **Peripheral:** with most links within their module
3. **Connector:** with many links to other modules
4. **Kinless:** with links homogeneously distributed among all modules

### Hub nodes:

5. **Provincial:** with bulk of connections within their module
6. **Connector:** with many connections to most of the other modules
7. **Kinless:** with links homogeneously distributed among all modules.

The nodes classified in gene-gene co-expression networks show various evidences. In Tp there appear non-hub kinless genes with multiple genes, see for instance TGM2, NPPB, and IL1A along with other genes involved significantly in biological processes related to homeostasis. Also, non-hub connector genes showed significant involvement in diverse biological processes such as blood vessel development, ECM, and negative regulation of proliferation. No annotations were retrieved for very few peripheral and ultra-peripheral nodes. Cp and Ip appear rich in peripheral nodes. Ip contains 50% of genes classified as non-hub kinless and non-hub connector genes, showing very little involvement in biological processes. Non-hub kinless genes COL1A2, ARHGDIB showed functions significantly related to the Rho Protein signal transduction, while non-hub connector genes CCND1, LAMA5, TSPAN31, GAL showed function related to regulation of cell proliferation. The peripheral nodes in Ip show important functionality at a genetic level in relation with ECM and regulation of cell adhesion, and also included are co-expressed NDN and GAS1 genes involved in many different biological processes such as developmental growth. Similarly, in Cp colony the co-expressed genes show in particular involvement in cell adhesion and

response to extracellular stimulus. In Pp, non-hub kinless genes amount to 36.5%, and genes PLAT, ENPP2, LAMA5, GAS1 annotate for cell motion, while very few genes from the 31.5% of non-hub connectors show involvement in biological processes. Genes IER3, IL1B, RRAGA, IL1A are predominantly related to both apoptotic and non-apoptotic functions. Peripheral nodes show co-expressed genes mostly showing variety of biological processes, such as estrogen stimulus, steroid hormone stimulus, and positive regulation of cell cycle. The peripheral genes CCND1, TXNIP, CCND2 involved in the above processes show high differential expression in OS cell lines.

### 3. Variation in PPINs.

**Mutations.** Proteins containing missense mutations showed no interactions except for FARP1 in Cp, whereas the COL protein family showed interactions and substitution of unknown type (SM Fig. 6). The seed proteins in each phenotype listed in Supplementary Table 4 contain different types of variations: missense, deletion – frame shift, unknown and substitution – coding silent showed no significant GO molecular function terms with adj p-value = 0.01 for Tp, and contains variations in Ip, Cp, and Pp in proteins having molecular functions related to platelet-derived growth factor binding, ECM structural constituent and growth factor binding. Both PHLDA1 and PPP2R2B, which have missense mutation along with IL1A with coding silent variation, are involved in biological processes related to cell death in Tp. Both FARP1 and FBN1 proteins, which show mutations, were DE in Cp. DEGs in Pp contained missense mutation in EEF1A2, STMN2, deletion- frameshift in ENPP2 and substitution – coding silent in IL1A were seen involved in anti-apoptotic activity (no enrichment was found for proteins having mutations in Cp and Ip).

**DE Transcription factors in Cp. SP7:** This gene encodes a member of the Sp subfamily of Sp/XKLF transcription factors. Sp family proteins are sequence-specific DNA-binding proteins characterized by an amino-terminal trans-activation domain and three carboxy-terminal zinc finger motifs. This protein is a bone specific transcription factor and is required for osteoblast differentiation and bone formation. **MYC:** The protein encoded by this gene is a multifunctional, nuclear phosphoprotein that plays a role in cell cycle progression, apoptosis and cellular transformation. It functions as a transcription factor that regulates transcription of specific target genes. **HOXB9:** This gene is a member of the Abd-B homeobox family and encodes a protein with a homeobox DNA-binding domain. It is included in a cluster of homeobox B genes located on chromosome 17. The encoded nuclear protein functions as a sequence-

specific transcription factor that is involved in cell proliferation and differentiation. Increased expression of this gene is associated with some cases of leukemia, prostate cancer and lung cancer. **FOX:** (Forkhead box) proteins are a family of transcription factors that play important roles in regulating the expression of genes involved in cell growth, proliferation, differentiation, and longevity.

#### **4. 1<sup>st</sup> PPIN: phenotypic characteristics.**

The 1<sup>st</sup> order PPIN networks comprised many overlapping modules in each OS phenotype with hubs as core nodes of the modules (see Supplementary file 6, molecular function annotations in modules). The Pp 1<sup>st</sup> order PPIN network is composed of 1447 proteins with on average 70.04 neighbors and higher CC, as compared with the other phenotypes. The central proteins of overlapping modules are particularly interesting, because of the crosslinks they enable (exerting global effects) and since they characterize specific module functions (Segal et al, 2003;Hydbring and Larsson, 2010). By looking at 26 overlapping modules found in Tp, CDK2, KISS1, TGM2 and IL1A showed processes predominantly related to nucleotide binding, enzyme regulator activity, cell cycle arrest and immune system process (Suppl Mat Table 3A). We note the presence of proteins corresponding to cell cycle genes, such as CDK2 and MYC, playing role in suppressing cellular senescence(Lawrenson et al, 2015), along with TP53, widely known and involved in cell cycle arrest, apoptosis and DNA repair.

Notably, the highly down-regulated NPPB along with the thrombospondin family (THBS2 and THBS3) mediating cell-to-cell and cell-to-matrix interactions and inhibiting tumor growth and angiogenesis, present modular activity of OS relevance from cancer-associated fibroblasts, already observed in lung and epithelial ovarian cancer (Aujollet et al, 2010; Bertin et al, 1997; Zhang et al, 2013). In Ip, CUL3 and CDK6 proteins appearing in multiple modules are involved in enzyme regulator activity along with protein and DNA binding. Then, PLAT, the KRT family proteins (KRT8, KRT31), and CXCL1 involve modularity related to Pyrimidine deoxy-ribonucleotide binding and signal transducer activities. Other modules refer to cytoskeletal protein binding, protein tyrosine kinases activity, and ECM structural constituent (Suppl Mat Table 3B). In general, invasiveness depends on aberrant activities transcription factors, protein kinases and phosphatases. We have noticed in modules both KISS1 and KISS1R, possibly indicating mediation effects, in particular promoting tumor growth (Savvidis et al, 2010;Silva, 2004). Moreover, the modular presence of the hyperactive Jak-Stat protein family in both Ip and Cp suggests relevance of enhancing motility, migration and invasiveness processes, already known in different cancers. Note that proliferation signaling often starts with growth factors activating receptor tyrosine

kinases, and subsequently other cascading pathways depending on the GPCR activation (Chandhanayingyong et al, 2012).

In Cp, modularity mainly depended on MYC and NFKB, and in other cases on promoter binding. Both GRB2 and MYC suggest OS involvement of the MAPK-ERK pathway (note that targeted inhibition of EFGR reduces colony forming, invasion and motility in OS cell lines (Tari et al, 1999; Teixeira and Reed, 2013). Modularity around JUN, MAFB and STAT4 proteins imply transcriptional regulation activity, whereas other proteins in the Stat family (STAT1, STAT3), FGFR3 and KRT8 underlie the modular involvement of receptor signaling protein activity (Supplementary Table 3C). Notably, Pp intra-modular proteins like for instance UBC, CDK2, CDK6, CUL1 and CUL3, and the F box family (FBXO4, FBXO5) along with CTRC and SNURF proteins, are mainly related to ubiquitin-protein ligase activity. The ubiquitin ligases are key players in cell cycle control and presence of proteins in Pp is relevant with respect to aggressive OS (Mc Gary et al, 2002; Randle and Laman, 2016). PDGFRA, PDGFC and PLAT formed modular activity and showed involvement in function related to platelet-derived growth factor receptor binding, ECM structural constituent and endopeptidase activity (see Suppl data S5). Core proteins PDGFRA, Fbox family proteins, CDK2, CUL1, along with proteins present in other modules such as NFKB1, KISS1R, PPP2CA EGFR, are known to enhance proliferation in cancer (Mongre et al, 2014; Forman et al, 2005) (Suppl Mat Fig. 4C).

### Supplementary References

Aujollet N, Meyer M, Cailliod R, Combier F, Coignet Y, Campard S, et al.(2010) High N-terminal pro-B-type natriuretic peptide: a biomarker of lung cancer? *Clin Lung Cancer*. 11(5): 341–5.

Bertin N, Clezardin P, Kubiak R, Frappart L. (1997) Thrombospondin-1 and -2 messenger RNA expression in normal, benign, and neoplastic human breast tissues: correlation with prognostic factors, tumor angiogenesis, and fibroblastic desmoplasia. *Cancer Res* 57(3): 396–9.

Chandhanayingyong C, Kim Y, Staples JR, Hahn C, Lee FY (2012) MAPK/ERK Signaling in Osteosarcomas, Ewing Sarcomas and Chondrosarcomas: Therapeutic Implications and Future Directions. *Sarcoma* 2012: 404810 .

Dijkstra EW (1959) A note on two problems in connexion with graphs. *Numer Math* 1(1): 269– 71.

Forman JJ, Clemons PA, Schreiber SL, Haggarty SJ, Eisenberg E, Levanon E et al (2005)

SpectralNET – an application for spectral graph analysis and visualization. *BMC Bioinform* 6: 260.

Freeman LC (1977). A set of measures of centrality based on betweenness. *Sociometry* 40: 35–40.

Guimerà R, Nunes Amaral LA (2005) Functional cartography of complex metabolic networks. *Nature* 433 (7028): 895–900.

Guimerà R, Sales-Pardo M, Amaral LA (2007) Classes of complex networks defined by role-to-role connectivity profiles. *Nat Phys* 3(1) 63–9.

Hydbring P, Larsson LG (2010) Tipping the balance: Cdk2 enables Myc to suppress senescence. *Cancer Res* 70(17) 6687–91.

Lawrenson K, Grun B, Lee N, Mhaweche-Fauceglia P, Kan J, Swenson S, et al. (2015) NPPB is a novel candidate biomarker expressed by cancer-associated fibroblasts in epithelial ovarian cancer. *Int J Cancer* 136(6): 1390–401.

McGary EC, Weber K, Mills L, Doucet M, Lewis V, Lev DC, et al (2002) Inhibition of platelet-derived growth factor-mediated proliferation of osteosarcoma cells by the novel tyrosine kinase inhibitor STI571. *Clin Cancer Res* 8(11): 3584–91.

Mihalik A, Csermely P (2011) Heat shock partially dissociates the overlapping modules of the yeast protein-protein interaction network: a systems level model of adaptation. *PLoS Comp Biol* 7(10): 24.

Mongre RK, Sodhi SS, Ghosh M, Kim JH, Kim N, Sharma N et al (2014) A New Paradigm to Mitigate Osteosarcoma by Regulation of MicroRNAs and Suppression of the NF- $\kappa$ B Signaling Cascade. *Dev Reprod* 18(4): 197–212.

Opsahl T, Agneessens F, Skvoretz J (2010) Node centrality in weighted networks: Generalizing degree and shortest paths. *Soc Networks* 32(3): 245–51.

Randle SJ, Laman H (2016) F-box protein interactions with the hallmark pathways in cancer. *Semin Cancer Biol* 36: 3–17.

Savvidis C, Papaioconomou E, Petraki C, Msaouel P, Koutsilieri M (2010) The role of KISS1/KISS1R system in tumor growth and invasion of differentiated thyroid cancer. *Anticancer Res* 35(2): 819–26.

Segal E, Shapira M, Regev R, Pe'er D, Botstein D, Koller D, et al. (2003) Module networks: identifying



regulatory modules and their condition-specific regulators from gene expression data. *Nat Genet* 34(2): 166–76.

Silva D (2004) Signaling pathways responsible for cancer cell invasion as targets for cancer therapy. *Curr Cancer Drug Targets* 4(4): 327–36.

Tari AM, Hung MC, Li K, Lopez-Berestein G (1999). Growth inhibition of breast cancer cells by Grb2 downregulation is correlated with inactivation of mitogen-activated protein kinase in EGFR, but not in ErbB2, cells. *Oncogene* 18(6): 1325–32

Teixeira LK, Reed SI (2013) Ubiquitin ligases and cell cycle control. *Annu Rev Biochem* 82: 387–414.

Watts DJ, Strogatz SH (1998) Collective dynamics of small-world networks. *Nature* 393(6684) 440–2.

Weisstein EW. Adjacency Matrix. Definition from MathWorld--A Wolfram Web Resource.

Zhang Y, Tang YJ, Li ZH, Pan F, Huang K, Xu GH (2013) KiSS1 inhibits growth and invasion of osteosarcoma cells through inhibition of the MAPK pathway. *Eur J Histochem* 57(4) e30

## SM Tables

**SM Table 1.** Cell Line specific evidences (DEGs) (top), followed by topological properties of DE miRNA-gene target networks. **A)** Proteins coding (seed proteins) for DEGs showing interactions in Human proteome (see methods) and n. of proteins and interactions in their 1st order networks composed of overlapping modules. **B)** Proteins for DEGs showing interactions in Human proteome (see methods) and n. of proteins and interactions in their 1st order networks composed of overlapping modules.

| <b>Tumorigenicity</b> | <b>Non-Tumorigenicity</b>      | <b>Colony forming ability</b> | <b>Non - colony forming ability</b>      | <b>Invasive/ migratory potential</b> | <b>Non-invasive</b>               | <b>Proliferation capacity</b> | <b>Non Proliferating</b>                |
|-----------------------|--------------------------------|-------------------------------|------------------------------------------|--------------------------------------|-----------------------------------|-------------------------------|-----------------------------------------|
| HOS, MHM, OHS and OSA | IOR/MOS, IOR/OS10 and IOR/OS18 | MG-63, HOS and OSA            | HAL, IOR/MOS, IOR/OS9, IOR/OS14 and ZK58 | HAL, HOS, OSA, U2OS                  | IOR/MOS, IOR/SARG, MG63 and ZK-58 | HOS, MHM, OHS and OSA         | HAL, IOR/MOS, IOR/OS9, IOR/OS14 and KPD |

| <b>A. gene – miRNA target networks</b> | Nodes | Links | Clustering Coefficient | Characteristic Pathlength | Average number of neighbors | Network heterogeneity | Diameter | Density |
|----------------------------------------|-------|-------|------------------------|---------------------------|-----------------------------|-----------------------|----------|---------|
| <b>Tumorigenic</b>                     | 281   | 2381  | 0.28                   | 2.759                     | 14.512                      | 1.200                 | 5        | 0.052   |
| <b>Colony forming</b>                  | 309   | 2372  | 0.261                  | 2.876                     | 13.638                      | 1.231                 | 5        | 0.044   |
| <b>Invasive</b>                        | 212   | 1168  | 0.243                  | 2.913                     | 9.377                       | 1.124                 | 8        | 0.044   |
| <b>Proliferative</b>                   | 168   | 658   | 0.223                  | 3.059                     | 6.476                       | 1.303                 | 8        | 0.039   |

| <b>B. 1st order PPIN</b> | Nodes | Links | N. of modules | Clustering Coefficient | Characteristic Path length | Network heterogeneity | Diameter | Density | Seed nodes | Links |
|--------------------------|-------|-------|---------------|------------------------|----------------------------|-----------------------|----------|---------|------------|-------|
| <b>Tumorigenic</b>       | 2032  | 58254 | 27            | 0.37                   | 2.25                       | 1.171                 | 6        | 0.028   | 102        | 20    |
| <b>Invasive</b>          | 1737  | 54097 | 24            | 0.38                   | 2.24                       | 1.122                 | 6        | 0.036   | 82         | 32    |
| <b>Colony forming</b>    | 2324  | 65197 | 17            | 0.36                   | 2.25                       | 1.259                 | 6        | 0.024   | 104        | 29    |
| <b>Proliferation</b>     | 1447  | 50675 | 26            | 0.43                   | 2.17                       | 1.004                 | 5        | 0.048   | 56         | 9     |

**SM Table 2.** Biological processes of seed proteins showing interactions in PPI networks A) Tp; B) Cp; C) Ip; D) Pp.

| <b>A) Tp</b>                                             |                                |                        |                |
|----------------------------------------------------------|--------------------------------|------------------------|----------------|
| <b>GO biological process complete</b>                    | <b>N. of proteins involved</b> | <b>Fold Enrichment</b> | <b>P value</b> |
| Collagen catabolic process                               | 4                              | 59.58                  | 4.89E-03       |
| Collagen metabolic process                               | 4                              | 51.53                  | 8.69E-03       |
| Multicellular organismal macromolecule metabolic process | 4                              | 48.27                  | 1.12E-02       |
| Multicellular organism metabolic process                 | 4                              | 41.00                  | 2.14E-02       |
| Multicellular organism catabolic process                 | 4                              | 53.71                  | 7.38E-03       |

| <b>B) Cp</b>                                             |                                |                        |                |
|----------------------------------------------------------|--------------------------------|------------------------|----------------|
| <b>GO biological process complete</b>                    | <b>N. of proteins involved</b> | <b>Fold Enrichment</b> | <b>P value</b> |
| Focal adhesion assembly                                  | 3                              | 90.40                  | 4.32e-02       |
| Cell-matrix adhesion                                     | 5                              | 30.13                  | 5.24e-03       |
| Cell-substrate adhesion                                  | 5                              | 22.05                  | 2.39e-02       |
| Cell-substrate adherens junction assembly                | 3                              | 90.40                  | 4.32e-02       |
| Collagen catabolic process                               | 4                              | 45.20                  | 1.56e-02       |
| Collagen metabolic process                               | 4                              | 39.09                  | 2.77e-02       |
| Multicellular organismal macromolecule metabolic process | 4                              | 36.62                  | 3.58e-02       |
| Single-multicellular organism process                    | 25                             | 3.43                   | 6.32e-08       |
| Multicellular organismal process                         | 26                             | 2.98                   | 3.00e-07       |
| Multicellular organism catabolic process                 | 4                              | 40.74                  | 2.35e-02       |
| Regulation of rho protein signal transduction            | 5                              | 32.58                  | 3.58e-03       |
| Regulation of ras protein signal transduction            | 5                              | 19.13                  | 4.75e-02       |
| Regulation of cellular process                           | 26                             | 1.83                   | 3.98e-02       |
| Regulation of biological process                         | 27                             | 1.81                   | 1.27e-02       |
| Regulation of response to stimulus                       | 16                             | 3.20                   | 3.35e-02       |
| Extracellular matrix organization                        | 9                              | 21.20                  | 1.91e-06       |
| Extracellular structure organization                     | 9                              | 21.13                  | 1.97e-06       |
| Response to acid chemical                                | 6                              | 14.91                  | 2.08e-02       |
| Response to stimulus                                     | 23                             | 2.21                   | 1.80e-02       |
| Morphogenesis of an epithelium                           | 7                              | 12.50                  | 8.67e-03       |
| Tissue morphogenesis                                     | 9                              | 12.86                  | 1.44e-04       |
| Tissue development                                       | 11                             | 5.32                   | 1.99e-02       |
| Anatomical structure development                         | 22                             | 3.23                   | 3.02e-05       |
| Developmental process                                    | 22                             | 3.15                   | 5.03e-05       |
| Anatomical structure morphogenesis                       | 16                             | 5.64                   | 1.09e-05       |
| Single-organism developmental process                    | 22                             | 3.23                   | 3.00e-05       |
| Tube development                                         | 8                              | 10.29                  | 5.56e-03       |
| Multicellular organism development                       | 22                             | 3.54                   | 4.96e-06       |
| Regulation of body fluid levels                          | 7                              | 10.12                  | 3.47e-02       |
| Cell migration                                           | 9                              | 8.51                   | 4.75e-03       |
| Cell motility                                            | 9                              | 7.73                   | 1.05e-02       |
| Movement of cell or subcellular component                | 11                             | 6.18                   | 4.59e-03       |

|                          |    |      |          |
|--------------------------|----|------|----------|
| Localization of cell     | 9  | 7.73 | 1.05e-02 |
| Organ morphogenesis      | 9  | 7.58 | 1.24e-02 |
| Animal organ development | 18 | 4.66 | 1.12e-05 |
| System development       | 21 | 3.89 | 3.42e-06 |

| <b>C) Ip</b>                          |                                |                        |                |
|---------------------------------------|--------------------------------|------------------------|----------------|
| <b>Go biological process complete</b> | <b>N. of proteins involved</b> | <b>Fold enrichment</b> | <b>P value</b> |
| Extracellular matrix organization     | 7                              | 15.94                  | 1.76e-03       |
| Extracellular structure organization  | 7                              | 15.89                  | 1.80e-03       |
| Single-organism process               | 29                             | 1.63                   | 2.80e-02       |
| Wound healing                         | 7                              | 10.52                  | 2.76e-02       |
| Response to wounding                  | 8                              | 9.99                   | 7.20e-03       |
| Tissue development                    | 12                             | 5.61                   | 3.52e-03       |
| Anatomical structure development      | 19                             | 2.70                   | 3.04e-02       |
| Developmental process                 | 19                             | 2.63                   | 4.57e-02       |
| System development                    | 17                             | 3.04                   | 3.10e-02       |
| Multicellular organism development    | 18                             | 2.80                   | 4.28e-02       |
| Single-multicellular organism process | 22                             | 2.92                   | 3.31e-04       |
| Multicellular organismal process      | 22                             | 2.43                   | 1.08e-02       |
| Biological regulation                 | 28                             | 1.72                   | 2.96e-02       |

| <b>D) Pp</b>                                |                                |                        |                |
|---------------------------------------------|--------------------------------|------------------------|----------------|
| <b>GO biological process complete</b>       | <b>N. of proteins involved</b> | <b>Fold Enrichment</b> | <b>P value</b> |
| <b>Extracellular matrix organization</b>    | 6                              | 25.62                  | 5.60E-04       |
| <b>Extracellular structure organization</b> | 6                              | 25.53                  | 5.71E-04       |

**SM Table 3:** Mutation in OS patients in PPI-miRNA networks.

| <b>Tp</b>      |                              |                            |                       |                      |
|----------------|------------------------------|----------------------------|-----------------------|----------------------|
| <b>Gene</b>    | <b>Type</b>                  | <b>Amino acid mutation</b> | <b>Somatic status</b> | <b>CDS Mutation</b>  |
| <b>COL6A3</b>  | Substitution - coding silent | p.L1194L                   | Confirmed             | c.3582G>A            |
| <b>COL6A3</b>  | Substitution - coding silent | p.L988L                    | Confirmed             | c.2964G>A            |
| <b>IL1A</b>    | Substitution - coding silent | p.V122V                    | Confirmed             | c.366G>A             |
| <b>PHLDA1</b>  | Substitution - Missense      | p.T277M                    | Confirmed             | c.830C>T             |
| <b>PPP2R2B</b> | Substitution - Missense      | p.S78N                     | Confirmed             | c.233G>A             |
| <b>Cp</b>      |                              |                            |                       |                      |
| <b>OLFM1</b>   | Substitution - coding silent | p.G385G                    | Confirmed             | c.1155G>A            |
| <b>STEAP3</b>  | Substitution - coding silent | p.S439S                    | Confirmed             | c.1317A>G            |
| <b>LEPREL1</b> | Unknown                      | p.?                        | Confirmed             | c.1549-8_1549-7insC  |
| <b>LEPREL1</b> | Unknown                      | p.?                        | Confirmed             | c.1549-8_1549-7insT  |
| <b>FBN1</b>    | Substitution - coding silent | p.G2811G                   | Confirmed             | c.8433G>A            |
| <b>FBN1</b>    | Substitution - Missense      | p.V2823E                   | Confirmed             | c.8468T>A            |
| <b>COL1A2</b>  | Unknown                      | p.?                        | Confirmed             | c.2133+3_2133+4insGT |
| <b>FARP1</b>   | Substitution - Missense      | p.A854V                    | Confirmed             | c.2561C>T            |
| <b>FARP1</b>   | Substitution - Missense      | p.A885V                    | Confirmed             | c.2654C>T            |
| <b>COL6A3</b>  | Substitution - coding silent | p.L1194L                   | Confirmed             | c.3582G>A            |
| <b>COL6A3</b>  | Substitution - coding silent | p.L988L                    | Confirmed             | c.2964G>A            |
| <b>COL4A1</b>  | Unknown                      | p.?                        | Confirmed             | c.652-5C>A           |
| <b>EEF1A2</b>  | Substitution - Missense      | p.T104M                    | Confirmed             | c.311C>T             |
| <b>FAM46A</b>  | Substitution - coding silent | p.L240L                    | Confirmed             | c.720T>C             |
| <b>FAM46A</b>  | Substitution - coding silent | p.L321L                    | Confirmed             | c.963T>C             |

| <b>Ip</b>     |                              |            |           |                      |
|---------------|------------------------------|------------|-----------|----------------------|
| <b>COL1A2</b> | Unknown                      | P.?        | Confirmed | c.2133+3_2133+4insGT |
| <b>EEF1A2</b> | Substitution - Missense      | p.T104M    | Confirmed | c.311C>T             |
| <b>COL4A1</b> | Unknown                      | p.?        | Confirmed | c.652-5C>A           |
| <b>Pp</b>     |                              |            |           |                      |
| <b>ENPP2</b>  | Deletion - Frameshift        | p.V697fs*2 | Confirmed | c.2088_2097del10     |
| <b>ENPP2</b>  | Deletion - Frameshift        | p.V670fs*2 | Confirmed | c.2007_2016del10     |
| <b>COL1A2</b> | Unknown                      | p.?        | Confirmed | c.2133+3_2133+4insGT |
| <b>STMN2</b>  | Substitution - Missense      | p.E115K    | Confirmed | c.343G>A             |
| <b>IL1A</b>   | Substitution - coding silent | p.V122V    | Confirmed | c.366G>A             |
| <b>EEF1A2</b> | Substitution - Missense      | p.T104M    | Confirmed | c.311C>T             |
| <b>COL4A1</b> | Unknown                      | p.?        | Confirmed | c.652-5C>A           |

**SM Table 4.** Shared pathways (32) in all OS phenotypes and corresponding DEGs.

| <b>Pathway Terms</b>                      | <b>Tp</b>        | <b>Ip</b>     | <b>Cp</b>                | <b>Pp</b>          |
|-------------------------------------------|------------------|---------------|--------------------------|--------------------|
| <b>a6b1 and a6b4 Integrin signaling</b>   | CD9, IL1A, LAMA4 | LAMA5         | LAMA5                    | IL1A, LAMA5, LAMC2 |
| <b>amb2 Integrin signaling</b>            | PLAU, RHOA, THY1 | PLAT, RHOA    | CTGF, PLAT               | PLAT               |
| <b>AP-1 transcription factor network</b>  | PLAU             | CCND1, COL1A2 | CCND1, COL1A2, GJA1, MYC | CCND1, COL1A2      |
| <b>ATF-2 transcription factor network</b> | CDK4, PLAU       | CCND1, PDGFRA | CCND1, CSR2              | CCND1              |

|                                                              |                                                                 |                                                    |                                                            |                                      |
|--------------------------------------------------------------|-----------------------------------------------------------------|----------------------------------------------------|------------------------------------------------------------|--------------------------------------|
| <b>Beta1 integrin cell surface interactions</b>              | COL6A1, COL6A2, COL6A3, ITGA11, LAMA4, PLAU, TGFBI, TGM2, THBS2 | COL11A1, COL1A2, COL4A1, COL4A2, LAMA5, MDK, TGFBI | COL1A2, COL3A1, COL4A1, COL6A3, ITGA11, LAMA5, TGM2, THBS1 | COL1A2, COL4A1, ITGA11, LAMA5, LAMC2 |
| <b>Beta2 integrin cell surface interactions</b>              | PLAU, TGFBI, THY1                                               | PLAT, TGFBI                                        | PLAT                                                       | PLAT                                 |
| <b>Beta3 integrin cell surface interactions</b>              | LAMA4, PLAU, SDC4, TGFBI, THY1                                  | COL1A2, COL4A1, COL4A2, TGFBI                      | COL1A2, COL4A1, IBSP, THBS1                                | COL1A2, COL4A1                       |
| <b>Caspase Cascade in Apoptosis</b>                          | KRT18                                                           | ARHGDIB, KRT18                                     | ARHGDIB                                                    | ARHGDIB                              |
| <b>C-MYB transcription factor network</b>                    | ADORA2B                                                         | CCND1, CDK6, COL1A2                                | CCND1, COL1A2, MYC                                         | CCND1, COL1A2                        |
| <b>Coregulation of Androgen receptor activity</b>            | FHL2                                                            | CCND1, CDK6, SNURF                                 | CCND1                                                      | CCND1, SNURF                         |
| <b>CXCR4-mediated signaling events</b>                       | ITGA11, RHOA, RHOB, RHOC                                        | RHOA, RHOB, RHOC                                   | ITGA11                                                     | ITGA11                               |
| <b>Direct p53 effectors</b>                                  | DKK1, IGFBP3, NDRG1                                             | CX3CL1                                             | STEAP3, TAP1                                               | NDRG1                                |
| <b>E-cadherin signaling in the nascent adherens junction</b> | RHOA                                                            | CCND1, RHOA                                        | CCND1, CTTN                                                | CCND1                                |
| <b>Endothelins</b>                                           | RHOA                                                            | COL1A2, RHOA                                       | COL1A2, COL3A1                                             | COL1A2                               |
| <b>FOXO1 transcription factor network</b>                    | CDK4, GAS1, LAMA4                                               | CCND1, GAS1                                        | CCND1, MYC                                                 | CCND1, GAS1                          |
| <b>Glucocorticoid receptor regulatory network</b>            | KRT17, SGK1                                                     | KRT17                                              | KRT17                                                      | KRT17                                |

|                                                                                   |                              |                                               |                                                  |                |
|-----------------------------------------------------------------------------------|------------------------------|-----------------------------------------------|--------------------------------------------------|----------------|
| <b>IL4-mediated signaling events</b>                                              | THY1                         | COL1A2                                        | COL1A2                                           | COL1A2         |
| <b>Integrin-linked kinase signaling</b>                                           | RHOG                         | CCND1, MYL9, RHOG                             | CCND1                                            | CCND1          |
| <b>Integrins in angiogenesis</b>                                                  | COL6A1, COL6A2, COL6A3, RHOA | COL11A1, COL1A2, COL4A1, COL4A2, COL8A1, RHOA | COL10A1, COL16A1, COL1A2, COL3A1, COL4A1, COL6A3 | COL1A2, COL4A1 |
| <b>Neurotrophic factor-mediated Trk receptor signaling</b>                        | RHOA, RHOG                   | CCND1, RHOA, RHOG                             | CCND1                                            | CCND1          |
| <b>Noncanonical Wnt signaling pathway</b>                                         | RHOA                         | RHOA                                          | CTHRC1                                           | CTHRC1         |
| <b>Presenilin action in Notch and Wnt signaling</b>                               | DKK1                         | CCND1                                         | CCND1, MYC                                       | CCND1          |
| <b>Regulation of nuclear beta catenin signaling and target gene transcription</b> | DKK1                         | CCND1, CCND2                                  | CCND1, MYC                                       | CCND1, CCND2   |
| <b>Regulation of nuclear SMAD2/3 signaling</b>                                    | CDK4                         | COL1A2                                        | COL1A2, MYC                                      | COL1A2         |
| <b>Regulation of retinoblastoma protein</b>                                       | CDK4                         | CCND1, CCND2, CDK6                            | CCND1                                            | CCND1, CCND2   |
| <b>Regulation of RhoA activity</b>                                                | RHOA                         | ARHGDIB, RHOA                                 | ARAP3, ARHGDIB, DLC1, FARP1                      | ARHGDIB        |
| <b>Signaling events mediated by focal adhesion kinase</b>                         | RHOA                         | CCND1, RHOA                                   | CCND1                                            | CCND1          |



|                                                                              |                        |                                                |                                                         |                       |
|------------------------------------------------------------------------------|------------------------|------------------------------------------------|---------------------------------------------------------|-----------------------|
| <b>Syndecan-1-mediated signaling events</b>                                  | COL6A1, COL6A2, COL6A3 | COL11A1, COL1A2, COL4A1, COL4A2, COL8A1, LAMA5 | COL10A1, COL16A1, COL1A2, COL3A1, COL4A1, COL6A3, LAMA5 | COL1A2, COL4A1, LAMA5 |
| <b>Validated targets of C-MYC transcriptional activation</b>                 | CDK4                   | CCND2, SERPIN1                                 | MYC                                                     | CCND2                 |
| <b>Validated targets of C-MYC transcriptional repression</b>                 | DKK1, NDRG1, TMEFF2    | CCND1, COL1A2                                  | CCND1, COL1A2, MYC, SFRP1                               | CCND1, COL1A2, NDRG1  |
| <b>Validated transcriptional targets of AP1 family members Fra1 and Fra2</b> | DCN, MGP, PLAU         | CCND1, COL1A2, DCN                             | CCND1, COL1A2, GJA1                                     | CCND1, COL1A2, DCN    |
| <b>Wnt signaling network</b>                                                 | DKK1, IGFBP4           | SOST                                           | CTHRC1, SOST                                            | CTHRC1                |

**SM Table 5:** Overlapping modular organization 1st order PPI networks characterizing each phenotype on the basis of molecular functions assigned to each module (based on molecular function of central proteins of the modules with significant p-value for phenotypes A) Tp; B) Ip; C) Cp; D) Pp (complete list in Supplementary file 3).

**A) Tp**

| Phenotype                 | module Id       | Module name | N. of nodes | Effective n. of nodes | Module size (sum of module assignment values) | Ten overlapping core proteins of module                  | Molecular function Description | Adj. P value |
|---------------------------|-----------------|-------------|-------------|-----------------------|-----------------------------------------------|----------------------------------------------------------|--------------------------------|--------------|
| Tumorigenic 1st order PPI | <b>Module 1</b> | UBC         | 2026        | 582.2                 | 1.68E+07                                      | UBC;ELAVL1;FN1;APP;TP53;SUMO2;CTNNB1;HSP90AA1;CDK2;ESR1; | Nucleotide binding             | 4.98E-02     |
|                           | <b>Module 2</b> | APP         | 2025        | 532.8                 | 1039330                                       | APP;UBC;CUL3;KISS1;HSP90AA1;A2M;FBLN1;HSP                | Enzyme regulator activity      | 2.70E-02     |

|                 |       |      |       |          |                                                                 |                                                      |          |
|-----------------|-------|------|-------|----------|-----------------------------------------------------------------|------------------------------------------------------|----------|
|                 |       |      |       |          | A5;CTNNB1;<br>YWHAZ;                                            |                                                      |          |
| <b>Module 3</b> | ADM   | 2014 | 18.43 | 61658.57 | ADM;MME;CFH;GPR182;RAMP2;EDN1;EEF1A1;NPPC;HSP90AA1;TUBA1A;      | Hormone activity                                     | 1.09E-03 |
| <b>Module 4</b> | ARRB2 | 1990 | 14.69 | 52401.83 | ARRB2;CALCRL;RAMP2;TGFB3;CXCL12;SDC3;CDK4;ARHGAP17;CDC42;HDAC2; | Alcitonin gene-related polypeptide receptor activity | 2.95E-02 |
| <b>Module 5</b> | ITGA4 | 1999 | 36.38 | 69721.17 | ITGA4;THBS2;HDAC4;THBS3;ITGB1;ADAM2;CD53;FCGR2C;MMP2;NPPB;      | Protein binding                                      | 3.28E-02 |
| <b>Module 6</b> | SUM01 | 1996 | 35.22 | 70296.2  | SUM01;PDGFC;FZD8;MZNF1;OBSCN;SYDE2;MAF;IKBKB;SDF2;EGR1;         | Platelet-derived growth factor receptor binding      | 1.47E-03 |
| <b>Module 7</b> | JUN   | 1987 | 19.83 | 31316.88 | JUN;PLXNA2;STAT4;MAF;PDZD2;CYP19A1;EGR1;SRF;BBS7;VAV1;          | Organ development                                    | 4.31E-02 |
| <b>Module 8</b> | CAND1 | 1988 | 26.98 | 34297.27 | CAND1;COL19A1;COL3A1;CD36;COL4A2;MMP2;CALML3;TF;F7;ECT2;        | Extracellular matrix structural constituent          | 9.59E-04 |
| <b>Module 9</b> | GRB2  | 1990 | 28.04 | 42610.52 | GRB2;SGCA;FGF7;DAG1;CCL5;KRT34;AMBP;ADAM12;CFH;SS18;            | Protein binding                                      | 4.04E-02 |

|                  |        |      |       |          |                                                                    |                                                |          |
|------------------|--------|------|-------|----------|--------------------------------------------------------------------|------------------------------------------------|----------|
| <b>Module 10</b> | PPP2CA | 1985 | 17.22 | 26152.81 | PPP2CA;KISS1R;PIR;SCHIP1;IER5;PTN;PXDNI;MYO9A;RHOB;PAXIP1;         | No annotations                                 |          |
| <b>Module 11</b> | MYC    | 1983 | 34.86 | 57936.12 | MYC;ROBO2;PLAU;ITGA1;SLIT2;MYO9A;NUCB1;UBQLN4;PDZD2;MRPL53;        | Signaling process                              | 1.89E-04 |
| <b>Module 12</b> | TUBA1A | 1983 | 27.05 | 30697.15 | TUBA1A;NPPC;MDK;SDC3;STARD13;KRT31;NPR3;NCK1;GLA;AFG3L2;           | Regulation of multicellular organism growth    | 3.87E-02 |
| <b>Module 13</b> | CUL2   | 1966 | 21.03 | 24804.75 | CUL2;LOXL1;ATXN1;MLPH;ELN;APOD;ARHGEF4;PEPD;OSGEP;CTSD;            | No annotations                                 |          |
| <b>Module 14</b> | CUL1   | 1995 | 34.72 | 40013.82 | CUL1;SLC7A9;TGM2;MYBPC3;RPRM;MMP2;FBXO2;SORL1;CDKN1C;GPATCH4;      | Cell cycle arrest                              | 6.19E-03 |
| <b>Module 15</b> | IL1A   | 1926 | 18.27 | 32310.1  | IL1A;TRAF6;IL1R2;CAPN1;IRAK1;HAX1;TOLLIP;TNFRSF13B;NFKBIE;MYD88;   | Immune system process                          | 8.89E-05 |
| <b>Module 16</b> | SFN    | 1958 | 14    | 18714.41 | SFN;ANPEP;TM4SF1;PKP3;ZFYVE19;ARHGEF16;DTX2;ARHGEF17;TRIM25;RHPN2; | Rho guanyl-nucleotide exchange factor activity | 2.15E-02 |

|                  |         |      |       |          |                                                                    |                                  |          |
|------------------|---------|------|-------|----------|--------------------------------------------------------------------|----------------------------------|----------|
| <b>Module 17</b> | HNRNPC  | 1961 | 19.52 | 20789.9  | HNRNPC;LMO3;PDGFB;CDC85B;MDFI;MBIP;IFIT1;KHDRBS3;ECT2;POLR2K;      | No annotations                   |          |
| <b>Module 18</b> | CANX    | 1967 | 13.13 | 14957.46 | CANX;AMBN;BGN;TF;SERPINF2;SUMO2;GRN;CD63;CD9;TOR1A;                | Zinc ion binding                 | 4.92E-02 |
| <b>Module 19</b> | NUDC    | 1955 | 9.52  | 13789.66 | NUDC;LXN;CPA4;GDI2;EEF1A1;KIAA101;ARIH1;RANBP2;RANGAP1;PRKACA;     | Zinc ion binding                 | 4.92E-02 |
| <b>Module 20</b> | DCUN1D1 | 1958 | 7.87  | 13797.48 | DCUN1D1;KIAA1199;GDI1;EEF1A1;SOCS5;SCRIB;CALM1;DAZAP2;SMAD2;GLRX3; | Protein binding                  | 3.56E-02 |
| <b>Module 21</b> | CAV1    | 1970 | 14.8  | 18177.69 | CAV1;RAB27B;UNC13D;MLPH;WNT3A;IGFBP3;KCNKA5;ACVRL1;GJB2;PRNP;      | Microtubule binding              | 3.39E-02 |
| <b>Module 22</b> | PAXIP1  | 1942 | 15.8  | 26996.5  | PAXIP1;SCAMP5;FBLN5;PLAU;ATN1;GFI1B;A2M;DNAJA1;EP300;TPM3;         | Enzyme binding                   | 2.86E-02 |
| <b>Module 23</b> | DCN     | 1951 | 10.57 | 19327.41 | DCN;SFTPD;EGFR;FLNA;BRCA1;WISP1;ELN;DPT;MMP3;GJA1;                 | Cytoskeletal protein binding     | 3.28E-02 |
| <b>Module 24</b> | NFIX    | 1863 | 6.51  | 15516.87 | NFIX;ALKBH3;RPS27A;ISG15;HDAC1;                                    | Transcription regulator activity | 1.44E-02 |

|  |                  |      |      |       |          |                                                                    |                            |  |          |
|--|------------------|------|------|-------|----------|--------------------------------------------------------------------|----------------------------|--|----------|
|  |                  |      |      |       |          | RB1;POLR2E;SUPT16H;RPS6KA1;SKI;                                    |                            |  |          |
|  | <b>Module 25</b> | LIG4 | 1892 | 10.49 | 13726.47 | LIG4;CTSK;SPARC;VKORC1;SERPINB13;EEF1A1;CREBBP;UNC119;PRKDC;XRCC6; | Protein C-terminus binding |  | 3.31E-02 |
|  | <b>Module 26</b> | GRN  | 1888 | 11.65 | 14407.02 | GRN;DLK1;HK3;SLPI;HOXA1;ZNF8;ELANE;FRAT1;GFI1B;GAS1;               | No annotations             |  |          |
|  | <b>Module 27</b> | BMP2 | 1845 | 5.52  | 7984.249 | BMP2;MGP;SMURF1;ACTR2;ACVR1;BMP1;SMURF2;SMAD4;SMAD1;COL2A1;        | SMAD binding               |  | 1.30E-09 |

## B) Ip

| Phenotype                      | module Id       | Module name | N. of nodes | Effective n. of nodes | Module size (sum of module assignment values) | Ten overlapping core proteins of module                     | Molecular function Description | Adj P value |
|--------------------------------|-----------------|-------------|-------------|-----------------------|-----------------------------------------------|-------------------------------------------------------------|--------------------------------|-------------|
| Invasive 1st order PPI network | <b>Module 1</b> | UBC         | 1730        | 528.4                 | 1.14E+07                                      | UBC;FN1;APP;GRB2;CDK2;ESR1;CUL3;CDK6;TP53;EEF1A1;           | Protein binding                | 2.42E-02    |
|                                | <b>Module 2</b> | APP         | 1730        | 404.82                | 635483.5                                      | APP;UBC;KISS1;CUL3;BGN;YWHAZ;COPS5;HSP90AA1;SERPINA3;HSPA5; | Enzyme regulator activity      | 9.46E-03    |
|                                | <b>Module 3</b> | FN1         | 1728        | 461.28                | 503463.2                                      | FN1;SERPINA3;EGFR;DCN;SUO2;APP;ERBB2;RAC1;UBC;N             | No annotations                 |             |

|                  |              |      |        |          |                                                                                          |                                                      |          |
|------------------|--------------|------|--------|----------|------------------------------------------------------------------------------------------|------------------------------------------------------|----------|
| <b>Module 4</b>  | ELAVL1       | 1723 | 223.17 | 418983.9 | FKB1;<br>ELAVL1;GAL;S<br>UMO2;TP53;CD<br>K6;CUL3;CUL1;<br>CDC42;GRB2;K<br>IAA0101;       | DNA binding                                          | 1.81E-02 |
| <b>Module 5</b>  | HSP90A<br>A1 | 1694 | 41.34  | 87355.91 | HSP90AA1;G6P<br>C;TRIM74;FBX<br>L2;METTL22;EP<br>HB6;STARD13;<br>ACVR2B;CNKS<br>R1;MMP2; | Enzyme<br>binding                                    | 3.48E-04 |
| <b>Module 6</b>  | YWHAZ        | 1696 | 50.53  | 60933.57 | YWHAZ;LUM;<br>ADAM22;PKP3;<br>NOXA1;GP5;GP<br>9;CBY1;GP1BB;<br>ARHGEF18;                 | No<br>annotations                                    |          |
| <b>Module 7</b>  | MDK          | 1654 | 31.48  | 68042.58 | MDK;TUBA1A;<br>GPC2;ACTG1;N<br>CL;RPL18A;ST<br>AT1;JAK1;MAP<br>K6;JAK2;                  | No<br>annotations                                    |          |
| <b>Module 8</b>  | NEDD8        | 1684 | 21.04  | 24518.74 | NEDD8;CTRC;R<br>HOBTB2;FBXO<br>4;ARHGEF4;DC<br>TPP1;KCTD13;<br>UBE2F;GDI1;H<br>RAS;      | Nucleotide<br>binding                                | 1.20E-02 |
| <b>Module 9</b>  | KRT8         | 1684 | 22.17  | 32294    | KRT8;QRSL1;T<br>CHP;PLAT;STA<br>M2;MOG;CLN5;<br>FGFR3;DEDD;K<br>RT31;                    | Pyrimidine<br>deoxyribonuc<br>leotide<br>binding     | 2.65E-02 |
| <b>Module 10</b> | PXN          | 1692 | 20.82  | 42156.5  | PXN;COL8A1;C<br>OL8A2;VCL;CO<br>L5A2;UBQLN4;<br>KLHL12;ITGA2;<br>ITGA1;PTPRZ1;           | No<br>annotations                                    |          |
| <b>Module 11</b> | CAND1        | 1687 | 26.2   | 30587.47 | CAND1;COL19<br>A1;COL3A1;CO<br>L6A2;COL4A2;<br>CD36;CALML3;<br>MMP2;PMEPA1<br>;CEP97;    | Extracellular<br>matrix<br>structural<br>constituent | 7.42E-04 |

|                  |        |      |       |          |                                                             |                                                |          |
|------------------|--------|------|-------|----------|-------------------------------------------------------------|------------------------------------------------|----------|
| <b>Module 12</b> | PPP2CA | 1687 | 13.77 | 17090.78 | PPP2CA;KISS1R;PPP2R5B;NPTN;MYO9A;NUBP2;RHOB;NXN;ECT2;INTS1; | No annotations                                 |          |
| <b>Module 13</b> | SUMO1  | 1692 | 34.09 | 33279.24 | SUMO1;PDGFC;RBM15B;MZF1;ZNF174;OBSCN;SYDE2;PTPRB;PLAT;ST14; | No annotations                                 |          |
| <b>Module 14</b> | YWHAE  | 1693 | 26.19 | 26706.01 | YWHAE;ADH1B;PML;RBM1A1;ADH4;CBY1;PDE4DIP;ADH1A;FBXO4;GP1BA; | Alcohol dehydrogenase activity. zinc-dependent | 1.58E-08 |
| <b>Module 15</b> | A2M    | 1639 | 20.2  | 32214.73 | A2M;CELA1;KLKB1;KLK2;PDGFA;PDGFB;TGFB;SHBG;MMP2;KLK3;       | Endopeptidase activity                         | 4.52E-05 |
| <b>Module 16</b> | TRAF6  | 1682 | 23.79 | 35726.51 | TRAF6;TNFRSF19;IL1A;TANK;TOLLIP;NDN;NGF;UEVLD;UBE2D4;REXO2; | Receptor binding                               | 1.83E-02 |
| <b>Module 17</b> | ACTB   | 1689 | 33.44 | 24327.51 | ACTB;TNNI2;CALM1;SHBG;NCF2;TRIM63;TNNT1;TAF11;TNNC1;CTSG;   | Cytoskeletal protein binding                   | 9.70E-06 |
| <b>Module 18</b> | SMAD3  | 1684 | 13.4  | 18023.33 | SMAD3;JPH3;CHRD;ZNF8;PLG;ZEB1;ISL1;GIT2;GDNF;UBQLN4;        | Sequence-specific DNA binding                  | 4.84E-02 |
| <b>Module 19</b> | CXCL9  | 1604 | 13.51 | 20933.21 | CXCL9;CX3CR1;MAPK1;TXN;GNAI2;CX3CL1;STAT1;TNF;GNG2;PLA2G1B; | Signal transducer activity                     | 3.92E-02 |
| <b>Module 20</b> | ANXA2  | 1644 | 10.6  | 9939.128 | ANXA2;ENAM;AHSG;COL2A1;COL5A1;PLG;PLAT;MYOC;CCNH;HNF1A;     | Structural molecule activity                   | 1.06E-02 |

|                  |      |      |      |          |                                                          |                                  |          |
|------------------|------|------|------|----------|----------------------------------------------------------|----------------------------------|----------|
| <b>Module 21</b> | TNK2 | 1634 | 8.63 | 10230.12 | TNK2;ARSE;NDN;SYNJ1;LTK;RASGRF1;BIN1;ALK;RPL18A;MCF2;    | Protein tyrosine kinase activity | 5.80E-03 |
| <b>Module 22</b> | AHSG | 1591 | 6.99 | 10270.34 | AHSG;AMELX;VKORC1;ENAM;DDB1;AKT1;CDC42;ATM;ATF2;TTN;     | Identical protein binding        | 1.19E-03 |
| <b>Module 23</b> | GRN  | 1575 | 8.59 | 7989.491 | GRN;DLK1;ZNF8;GAS1;ELANE;FRAT1;CDK2;KIAA0101;TJP3;PRKDC; | No annotations                   |          |
| <b>Module 24</b> | SHBG | 1575 | 4.33 | 5421.888 | SHBG;KLK4;SRF;LRP2;EIF3E;ATP5A1;AP1B1;EF1A1;DSTN;ACTG2;  | No annotations                   |          |

### C) Cp

| Phenotype                  | Module Id       | Module name | N. of nodes | Effective n. of nodes | Module size (sum of module assignment values) | Ten overlapping core proteins of module                     | Molecular function Description                          | Adj P value |
|----------------------------|-----------------|-------------|-------------|-----------------------|-----------------------------------------------|-------------------------------------------------------------|---------------------------------------------------------|-------------|
| Colony forming ability 1st | <b>Module 1</b> | UBC         | 2318        | 625.89                | 2.38E+07                                      | UBC;MYC;APP;FN1;ELAVL1;GRRB2;CUL3;ESR1;YWHAZ;TP53;          | Promoter binding                                        | 1.58E-03    |
|                            | <b>Module 2</b> | HSP90AA1    | 2305        | 39.97                 | 95549.34                                      | HSP90AA1;G6PC;HOPX;CAMK1G;FGFR3;MMP2;EPHB6;TIE1;IFIT1;ROR2; | Transmembrane receptor protein tyrosine kinase activity | 3.89E-06    |



|                  |          |      |       |          |                                                                      |                                        |          |
|------------------|----------|------|-------|----------|----------------------------------------------------------------------|----------------------------------------|----------|
| <b>Module 3</b>  | HSP90AB1 | 2288 | 28.24 | 37871    | HSP90AB1;CY P17A1;PPP2R4;FGFR3;POR;IFIT1;LGALS4;TNNT1;STARD13;MKNK1; | NADPH-hemoprotein reductase activity   | 3.24E-02 |
| <b>Module 4</b>  | NEDD8    | 2272 | 19.71 | 29408.03 | NEDD8;CTRC;SERPINA3;RHOBTB2;FBXO4;TST;TFE3;ARHGEF4;HIST1H2BG;NDUFS6; | No annotations                         |          |
| <b>Module 5</b>  | JUN      | 2298 | 24.07 | 39717.32 | JUN;PLXNA2;MAFB;DHX37;HOOK2;FOSB;SHANK1;STAT4;HAP1;MAF;              | Transcription regulator activity       | 4.85E-03 |
| <b>Module 6</b>  | PPP2CA   | 2283 | 15.18 | 24471.55 | PPP2CA;KISS1R;KISS1;PTN;CTTNBP2;NPTN;PPP2R5B;RHOB;DVL3;MYO9A;        | Protein phosphatase regulator activity | 1.81E-02 |
| <b>Module 7</b>  | SUMO2    | 2298 | 42.15 | 66807.51 | SUMO2;CSRP2BP;CUL4A;WDR5;KALRN;FOX P1;CXXC1;POR;CSRP2;SUPT7L;        | Ubiquitin protein ligase binding       | 3.19E-02 |
| <b>Module 8</b>  | A2M      | 2229 | 23.25 | 53355.65 | A2M;CELA1;IL10;EGLN2;KNG1;KLKB1;TGFB1;KLK2;IL1B;PDGFB;               | Growth factor binding                  | 1.16E-03 |
| <b>Module 9</b>  | MAPK3    | 2268 | 11.11 | 19841.48 | MAPK3;CPXM1;PLAT;IGF1;BTBD10;KIAA0101;SOS1;PRDX3;MKNK1;GJA1;         | No annotations                         |          |
| <b>Module 10</b> | MF12     | 2269 | 10.32 | 40449.67 | MF12;PDIA3;DERL3;DERL1;GYPC;DERL2;COL6A3;PDIA2;CDK2;RAC1;            | Protein disulfide isomerase activity   | 3.95E-04 |

|                  |          |      |       |          |                                                                   |                                        |          |
|------------------|----------|------|-------|----------|-------------------------------------------------------------------|----------------------------------------|----------|
| <b>Module 11</b> | DCUN1D1  | 2243 | 7.35  | 15108.29 | DCUN1D1;KIAA1199;GDI1;NFKB1;SMAD2;ARHGEF1;EEF1A1;CALM1;MCC;SCRIB; | Promoter binding                       | 2.81E-02 |
| <b>Module 12</b> | FGFR3    | 2185 | 12.27 | 33017.59 | FGFR3;CCDC17;CTSK;GPSM3;HSPA8;STAT1;KRT8;PTK2B;HNRNPL;STAT3;      | Receptor signaling protein activity    | 4.00E-02 |
| <b>Module 13</b> | IL1B     | 2207 | 8.19  | 18921.92 | IL1B;IL1R2;IL10;MMP2;SQSTM1;SP1;MAP3K3;EGR1;RELA;TRAF6;           | Ion binding                            | 1.97E-02 |
| <b>Module 14</b> | SERPINA3 | 2216 | 6.36  | 17816.78 | SERPINA3;CTRL;KLK4;NFKB1;ERBB2;PSMA3;POLA1;STK4;CMA1;LMNB1;       | Endopeptidase activity                 | 3.61E-03 |
| <b>Module 15</b> | FAM107A  | 2112 | 7.678 | 19782.09 | FAM107A;WDR47;VIM;CANX;DCD;TRAF2;PPP2R2A;TADA2A;KRT19;USP15;      | Structural constituent of cytoskeleton | 4.31E-02 |
| <b>Module 16</b> | SHBG     | 2135 | 5.545 | 8460.812 | SHBG;KLK4;SERPINA3;SRF;EEF1A1;LRP2;UBE20;SNRNP70;ATP5A1;EIF3E;    | No annotations                         |          |
| <b>Module 17</b> | LIG4     | 2158 | 10.81 | 9118.615 | LIG4;CTSK;KNG1;SPARC;FGFR3;VKORC1;DOK1;THOC5;EEF1A1;DPM1;         | DNA ligase activity                    | 2.91E-02 |

#### D) Pp

| Phen | Module Id | Module name | Number of | Effective number | Module size | Ten overlapping | Molecular function | Adj P value |
|------|-----------|-------------|-----------|------------------|-------------|-----------------|--------------------|-------------|
|------|-----------|-------------|-----------|------------------|-------------|-----------------|--------------------|-------------|

|                 |                      | nodes | of nodes        | (sum of module assignment values) | core proteins of module                                                                                   | Description                               |                 |
|-----------------|----------------------|-------|-----------------|-----------------------------------|-----------------------------------------------------------------------------------------------------------|-------------------------------------------|-----------------|
| <b>Module 1</b> | UBC                  | 1443  | 489             | 0.00059892                        | UBC; FN1; APP; EEF1A1; CDK2; SUMO2; CUL3; ESR1; GRB2; CUL1;                                               | Ubiquitin protein ligase binding          | 5.99E-04        |
| <b>Module 2</b> | APP                  | 1444  | 350             | 386096.8                          | APP;CUL3;KISS1;UBC;SERPINA3;TRAF6;ACTB;COPS5;MMP24;GRB2;                                                  | Enzyme binding                            | 3.29E-02        |
| <b>Module 3</b> | FN1                  | 1442  | 443             | 409380.5                          | FN1;SERPINA3;DCN;EGFR;APP;NFKB1;SUMO2;UBC;EEF1A1;BRCA1;                                                   | DNA binding                               | 3.07E-02        |
| <b>Module 4</b> | YWHAZ                | 1402  | 46              | 113822.5                          | YWHAZ;EFNB3;RHBDL2;LUM;GP5;GP9;GP1BB;ARHGEF18;ARHGEF16;TC EB1;                                            | Guanylnucleotide exchange factor activity | 3.80E-02        |
| <b>Module 5</b> | HSP90A<br><b>RLG</b> | 1425  | 40<br><b>12</b> | 76.021                            | HSP90AA1;<br><b>PCG6;SERP1;<br/>NIR3;PLA1;<br/>MMP3;MMP2<br/>FB;ACTG01L<br/>B;MAB;EP30<br/>0;ANXA2;TI</b> | No Annotations                            | <b>6.14E-03</b> |
| <b>Module 6</b> | ELAVL1<br>SHBG       | 1427  | 39<br>7         | 99855.51                          | <b>AM1;L1;AD<br/>SHBG;KIF4;<br/>EESEADINE<br/>E2;F2;H5A<br/>;CCTB;ED3<br/>R4;CEMDNA;<br/>TRNA;</b>        | No Annotations                            | 1.67E-02        |

|                  |          |      |    |          |                                                                              |                                                 |          |
|------------------|----------|------|----|----------|------------------------------------------------------------------------------|-------------------------------------------------|----------|
| <b>Module 7</b>  | HSP90AB1 | 1406 | 29 | 29110.91 | HSP90AB1; CYP17A1;PP P2R4;TRIM 8;STARD13; TAF1D;CHORDC1;RPAI N;ARHGAP1 ;A2M; | enzyme regulator activity                       | 8.44E-03 |
| <b>Module 8</b>  | NEDD8    | 1408 | 21 | 19.719   | NEDD8;CTRC;ARHGEF4; RHOBTB2;TST;FBXO4;PIP;GDI1;FBXO5;UBE2K;                  | Ubiquitin-protein ligase activity               | 4.44E-02 |
| <b>Module 9</b>  | TP53     | 1409 | 39 | 53772.11 | TP53;BMP1;DMTF1;S100B;RASGRF1;LAMA4;SMYD2;TRIM8;SNURF;FBXO4;                 | Receptor binding                                | 1.17E-02 |
| <b>Module 10</b> | SUMO1    | 1404 | 28 | 30.286   | SUMO1;PDGFC;MAF;SYDE2;PDGFRA;MAFA;SULT1A1;EGR1;PLAT;STMN2;                   | Platelet-derived growth factor receptor binding | 1.89E-03 |
| <b>Module 11</b> | KIAA0101 | 1403 | 34 | 34415.84 | KIAA0101;ELANE;COL4A2;MMP2;GNS;LRP1;THBS1;ITSN1;ANKFY1;SDC1;                 | Ion binding                                     | 2.89E-02 |
| <b>Module 12</b> | UBD      | 1395 | 16 | 18.408   | UBD;ENPP2;NPPB;HDAC4;RHOT1;RHOT2;MGRN1;CTTN;EWSR1;SUMO2;                     | Protein binding                                 | 3.72E-02 |
| <b>Module 13</b> | PPP2CA   | 1401 | 15 | 15.403   | PPP2CA;KISS1R;PPP2R5B;NPTN;MYO9A;RHOB;ECT2;NXN;I                             | No annotations                                  |          |

|                  |       |      |    |          |                                                                  |                                             |          |
|------------------|-------|------|----|----------|------------------------------------------------------------------|---------------------------------------------|----------|
|                  |       |      |    |          | ER3;PFDN1;                                                       |                                             |          |
| <b>Module 14</b> | HSPA5 | 1417 | 48 | 31614.04 | HSPA5;HSPA8;DNAJC1;CLTC;PRTN3;PRNP;CTSG;COL7A1;MAP3K8;NFKBIE;    | Chaperone binding                           | 1.30E-02 |
| <b>Module 15</b> | NONO  | 1396 | 16 | 12.813   | NONO;ZNRD1;HAX1;IRAK3;MAD1L1;SOCS3;DLD;A2M;GDI2;MRPL41;          | Interleukin-1 binding                       | 1.39E-03 |
| <b>Module 16</b> | YWHAE | 1412 | 24 | 20.397   | YWHAE;ADH1B;PML;GSTA1;RBMY1A1;IRAK3;FBXO4;GP1BA;RASGRF1;RCN2;    | Protein homodimerization activity           | 4.66E-02 |
| <b>Module 17</b> | PXN   | 1414 | 21 | 15.365   | PXN;COL5A2;COL6A3;COL6A2;ITGA1;GFRA1;COL4A2;GDNF;COL5A1;GAB1;    | Extracellular matrix structural constituent | 5.71E-08 |
| <b>Module 18</b> | A2M   | 1398 | 22 | 33037.53 | A2M;CELA1;IL10;TNF;IL1B;TGFB1;KLK2;KLKB1;MMP2;SHBG;              | Endopeptidase activity                      | 2.33E-03 |
| <b>Module 19</b> | CKB   | 1392 | 27 | 23053.1  | CKB;SERP2;EWSR1;KIAA0947;MYH4;USPL1;VSI G8;SELENBP1;FABP4;KRT34; | Calmodulin binding                          | 4.35E-02 |

|                  |        |      |    |        |                                                                  |                                |          |
|------------------|--------|------|----|--------|------------------------------------------------------------------|--------------------------------|----------|
| <b>Module 20</b> | PFN1   | 1388 | 9  | 8.142  | PFN1;CMA1;NCK1;CDK2;RHOQ;PIK3R1;CUL3;LIG4;ESR1;LRF1;             | Hormone binding                | 1.86E-02 |
| <b>Module 21</b> | BARD1  | 1391 | 10 | 11.666 | BARD1;ZFP64;HAP1;MAFB;CDK2;SELENBP1;PIK3R2;MAPK1;ESR1;RELA;      | Transcription factor binding   | 1.03E-03 |
| <b>Module 22</b> | TUBB   | 1401 | 30 | 14.222 | TUBB;GLIS2;CTNNB1;APC;CDH1;CCND1;CPSF1;DISC1;CRYZ;NCAM1;         | Enzyme binding                 | 4.45E-03 |
| <b>Module 23</b> | CDKN1A | 1387 | 14 | 11.743 | CDKN1A;TEX11;MAD1L1;STMN2;CCDC85B;COL4A5;CLEC3B;E2F2;CDC42;EGR1; | No annotations                 |          |
| <b>Module 24</b> | IL1B   | 1389 | 10 | 12.461 | IL1B;IL1R2;IL1A;TRAF6;SQSTM1;MAP2;RELA;IL10;SP1;MAP3K3;          | Growth factor receptor binding | 9.93E-04 |

**SM Table 6.** Pathways specific in all OS phenotypes (from corresponding DEGs).

| Phenotype | Pathways |
|-----------|----------|
|-----------|----------|

|                       |                                                                                                                                                                                                                                                                                                                                                                                                                                               |
|-----------------------|-----------------------------------------------------------------------------------------------------------------------------------------------------------------------------------------------------------------------------------------------------------------------------------------------------------------------------------------------------------------------------------------------------------------------------------------------|
| <b>Tumorigenic</b>    | Beta5 beta6 beta7 and beta8 integrin cell surface interactions; Insulin Pathway; ErbB1 downstream signaling; FoxO family signaling; ATR signaling pathway; Urokinase-type plasminogen activator (uPA) and uPAR-mediated signaling; Calcineurin-regulated NFAT-dependent transcription in lymphocytes; Proteoglycan syndecan-mediated signaling events; Glypican 1 network; Signaling events mediated by HDAC Class III; ALK1 signaling events |
| <b>Invasive</b>       | PDGF receptor signaling network; Internalization of ErbB1; Glypican 2 network; Retinoic acid receptors-mediated signaling; Circadian rhythm pathway; PDGFR-alpha signaling pathway                                                                                                                                                                                                                                                            |
| <b>Colony forming</b> | LKB1 signaling events; IL2 signaling events mediated by PI3K; Ceramide signaling pathway; IL6-mediated signaling events; CD40/CD40L signaling; RAC1 signaling pathway; Angiopoietin receptor Tie2-mediated signaling; EphrinB-EPHB pathway; Glypican 3 network; Syndecan-3-mediated signaling events; Ephrin B reverse signaling                                                                                                              |
| <b>Proliferation</b>  | No specific pathways specific                                                                                                                                                                                                                                                                                                                                                                                                                 |

# SM FIGURES

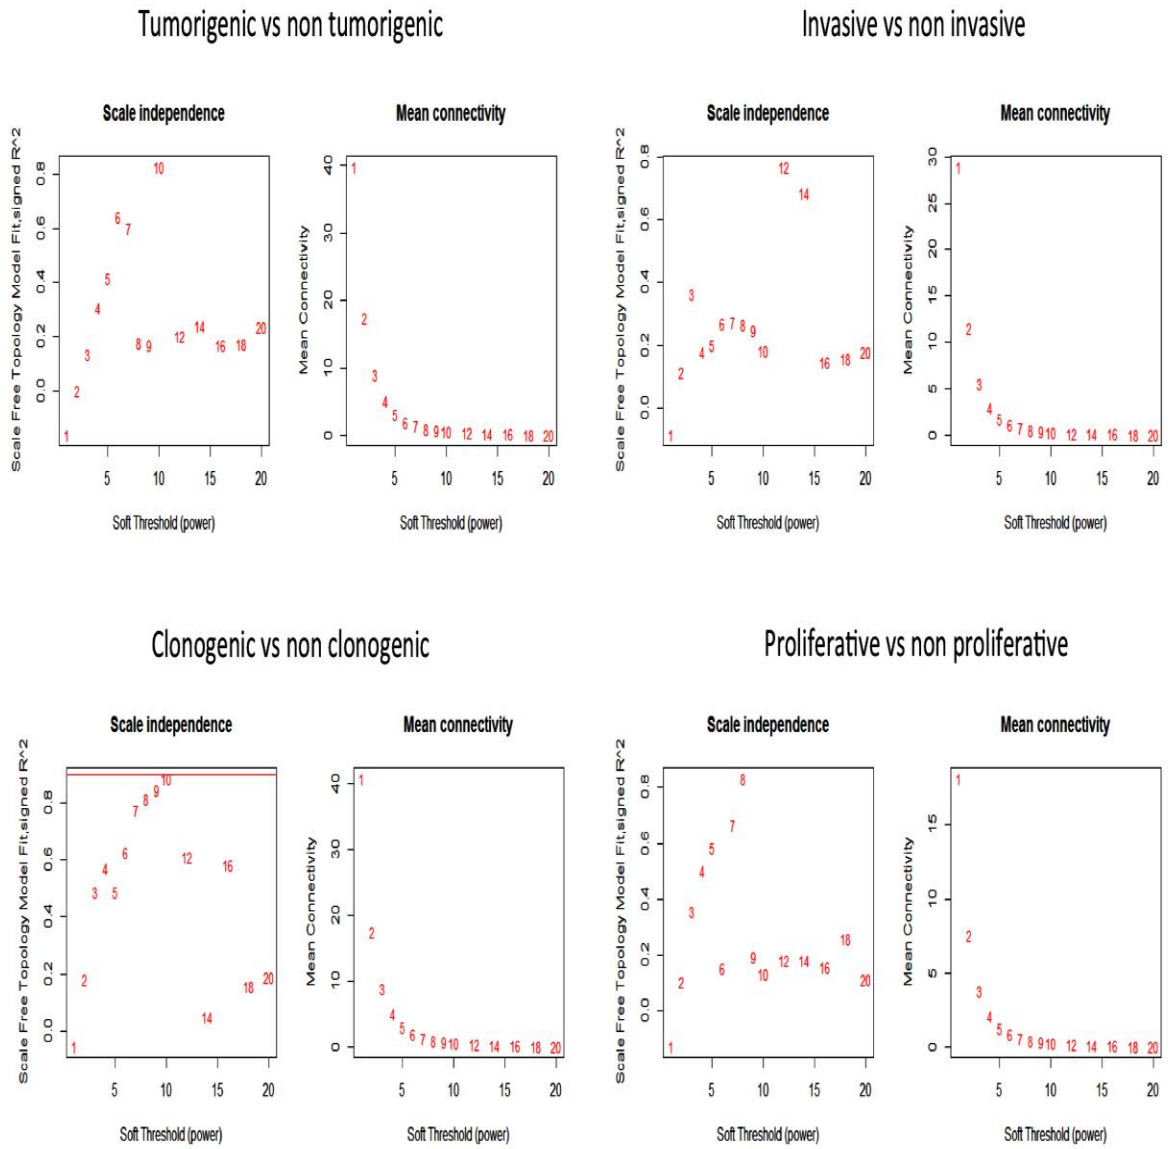

**SM Fig. 1:** Mean connectivity plot for gene co-expression network showing scale free property.



A) Tp (top-left), Ip (top-right), Cp (bottom-left), Pp (bottom-right)

B) gene-gene co-expression networks

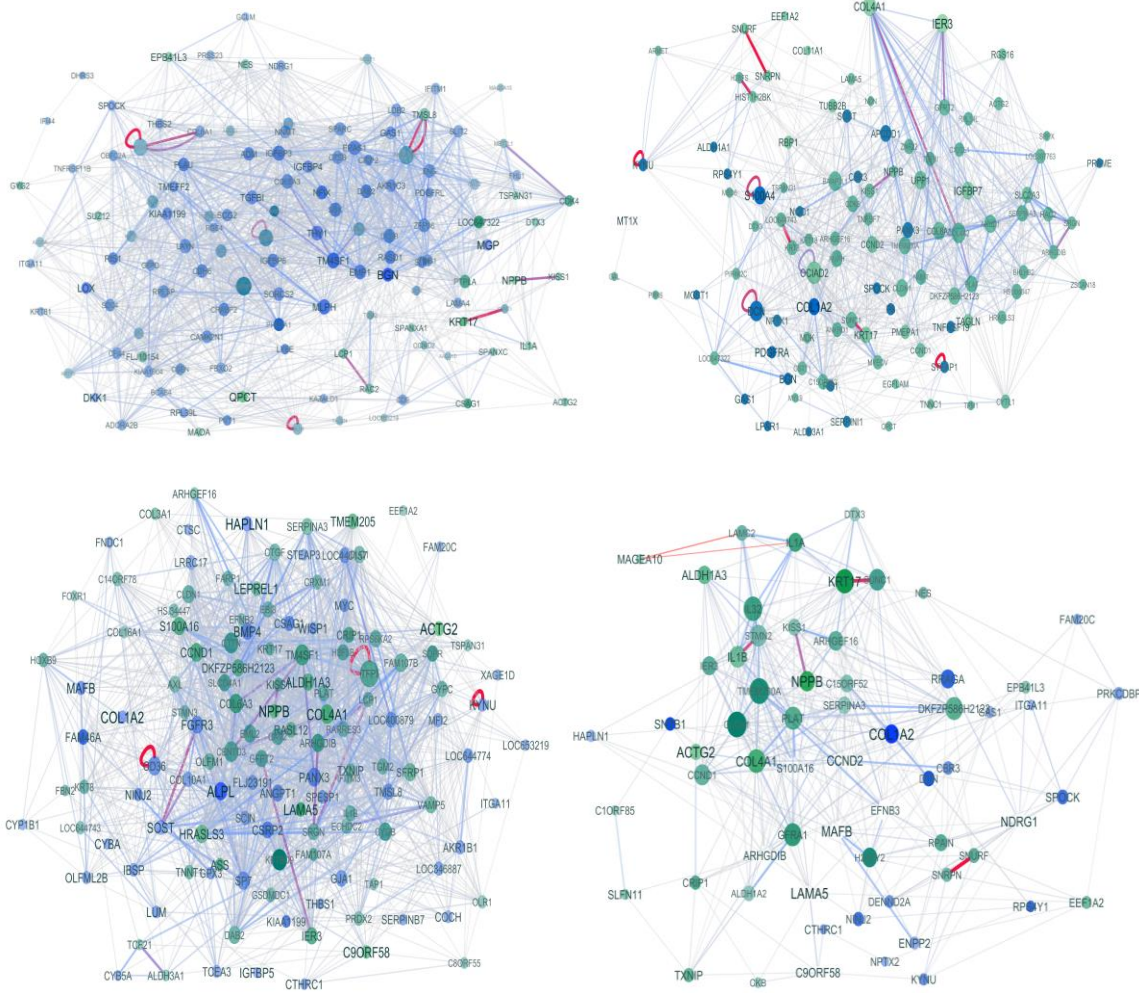

**SM Fig. 2: Gene – gene co-expression networks.** A) Tumorigenic, B) Invasive and C) Colony forming D) Proliferation phenotype. Bigger node size denotes more interactions with other nodes and colors from green to blue shows negative to positive differential expression, i.e.  $\log(\text{FC})$ . The circles represent genes, and the bigger the more connected. The links connect genes weighted by co-expression of genes in the phenotypes. Tp, Cp and Ip present visible self-loops (self-regulating expression).



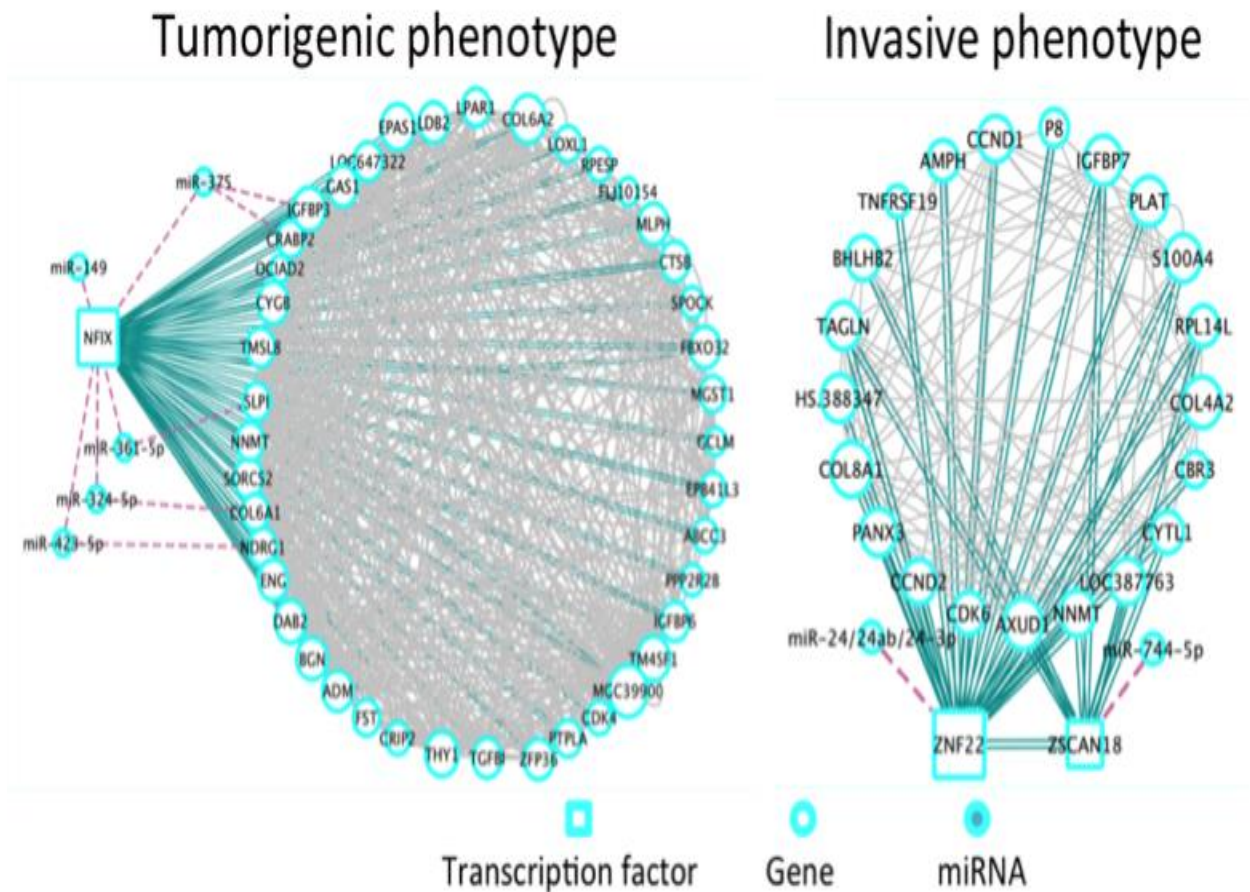

**SM Fig. 3: Core skeletons of miRNA-target gene networks.** Tp (top-left), Ip (top-right), Cp (bottom-left), Pp (bottom-right). Blue to Red colors and larger node size denote network cc. Higher DE hubs (large circles) characterize Tp - Ip, whereas non-hubs appear highly expressed in Cp-Pp. The DEGs in Cp and Pp networks show relatively higher network heterogeneity (Suppl Fig 13; Suppl file 2), and the higher characteristic path length indicates less efficiency in information transfer. Degree distribution of gene-gene co-expression networks shown in the middle.



## PPI-miRNA network: Tumorigenic phenotype

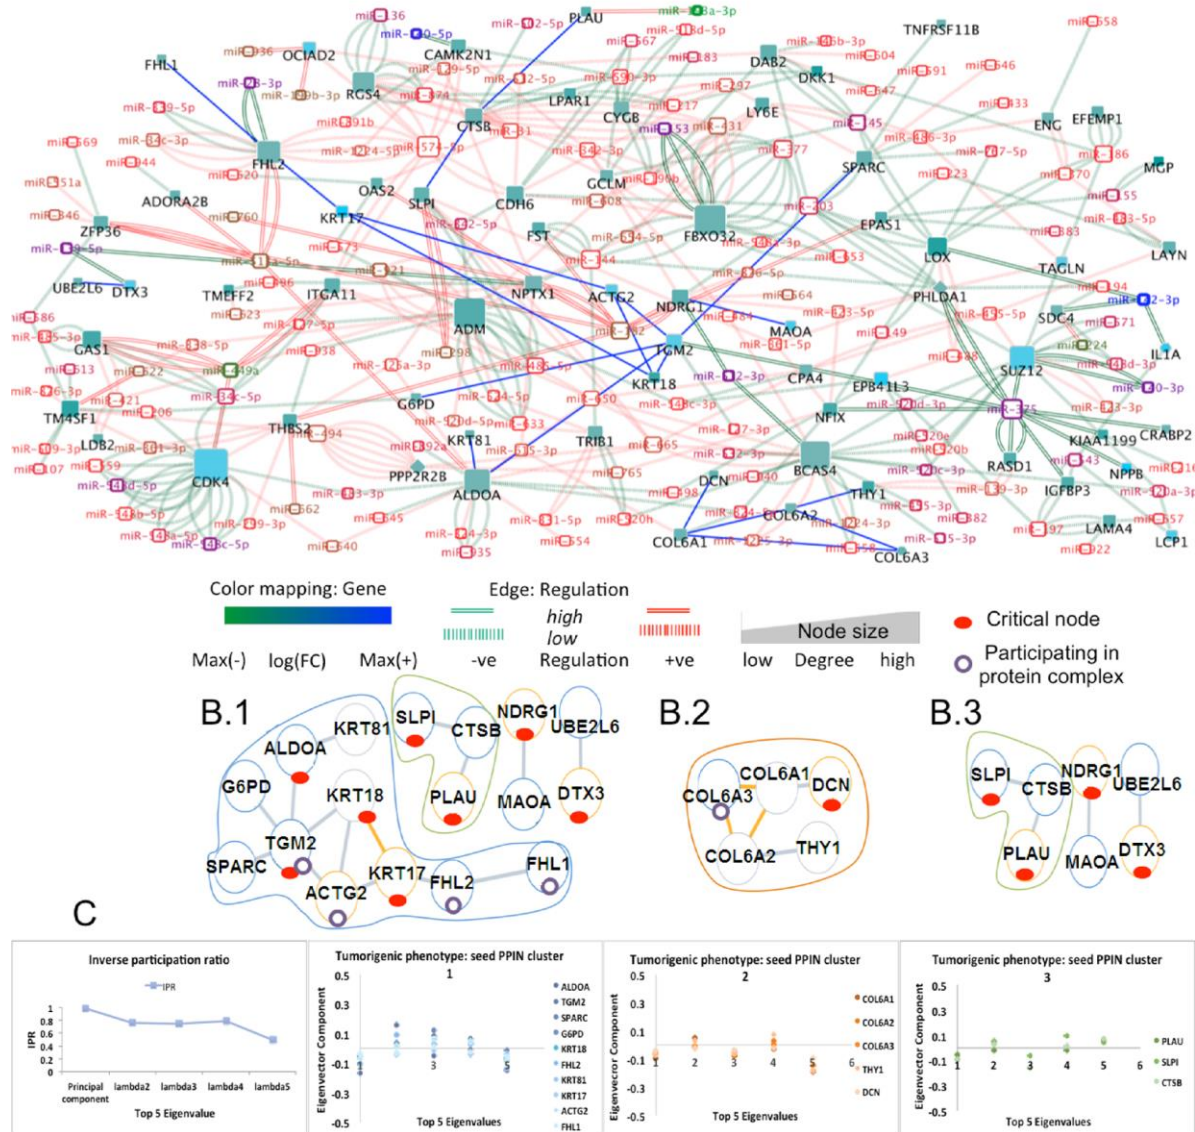

**SM Fig. 4A.** Tp PPI-miRNA network where edges originating high DE miRNAs are denoted by parallel lines and red color, while low expressions are denoted by dotted lines and grey color. Proteins involved in pathways appear with dashed lines and orange color, and protein-protein interactions with single blue line. Color and labels of the nodes are colored on the basis of the log(FC) of values for genes and miRNAs, respectively.

# PPI-miRNA network: Proliferation phenotype

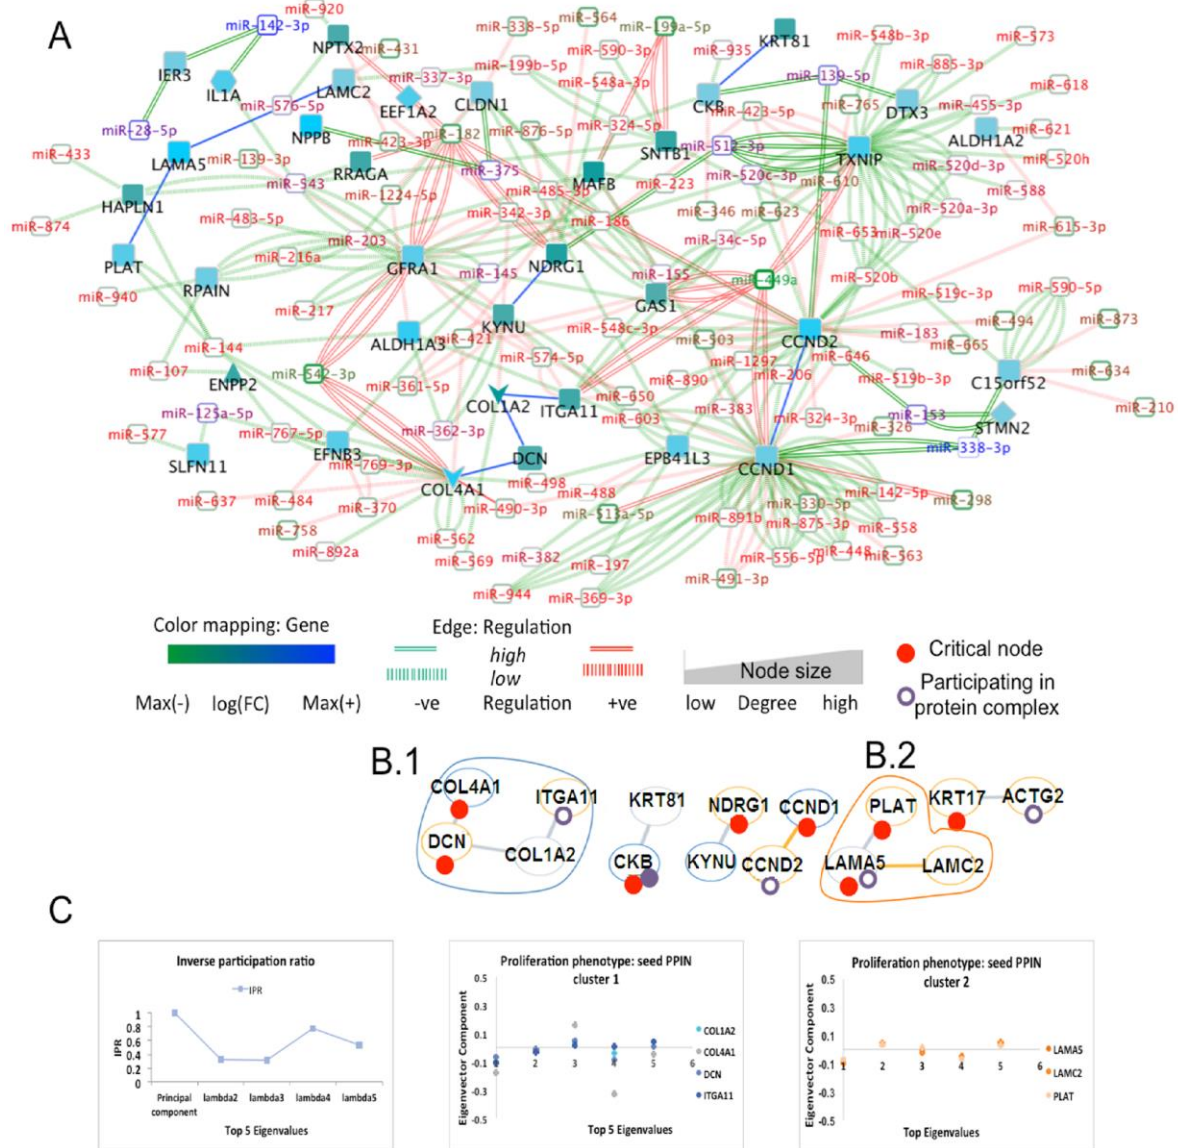

**SM Fig. 4B.** Pp PPI-miRNA network where edges originating high DE miRNAs are denoted by parallel lines and red color, while low expressions are denoted by dotted lines and grey color. Protein-protein interactions are shown with single blue line. Color and labels of the nodes are colored on the basis of the log(FC) values for genes and miRNAs, respectively.

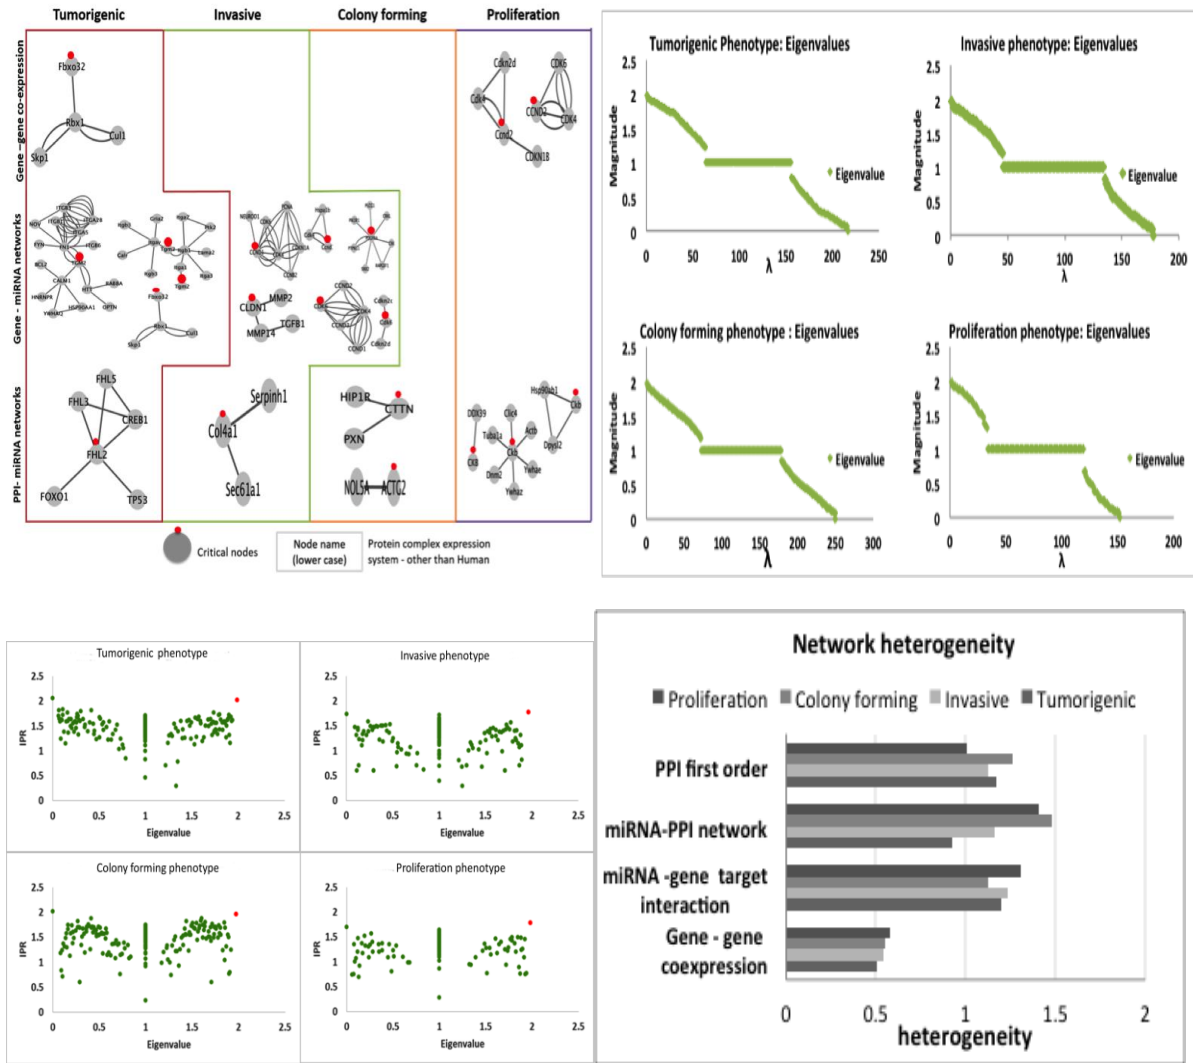

**SM Fig. 5.** Top-left: **Critical nodes in multitype networks showing participation in protein complexes.** The node names in upper case are experimentally verified in humans and node names in lower case are verified in other organism such as *Rattus Norvegicus* and *Mus Musculus*. Top-right: **Ranked eigenvalues** for PPIN-miRNA networks indicating typical trees-of-trees organization. Magnitude on Y-axis refers to minimized energy value (24). Bottom-left: **Inverse participation ratio (IPR)** vs Eigenvalues scatterplot showing similar trends as shown by (17) and illustrating that scale-free networks are best fitted with the measured data. The red dots are showing IPR for the principal Eigenvalue. Bottom-right: **Network heterogeneity.** It equals the coefficient of variation of the connectivity distribution, i.e. square root of variance of  $\langle K \rangle / \text{mean}(\langle K \rangle)$ , where  $k$  is the connectivity of the node, which tells us about tendency of networks to contain hubs.



## Drug repositioning networks

Tumorigenic phenotype

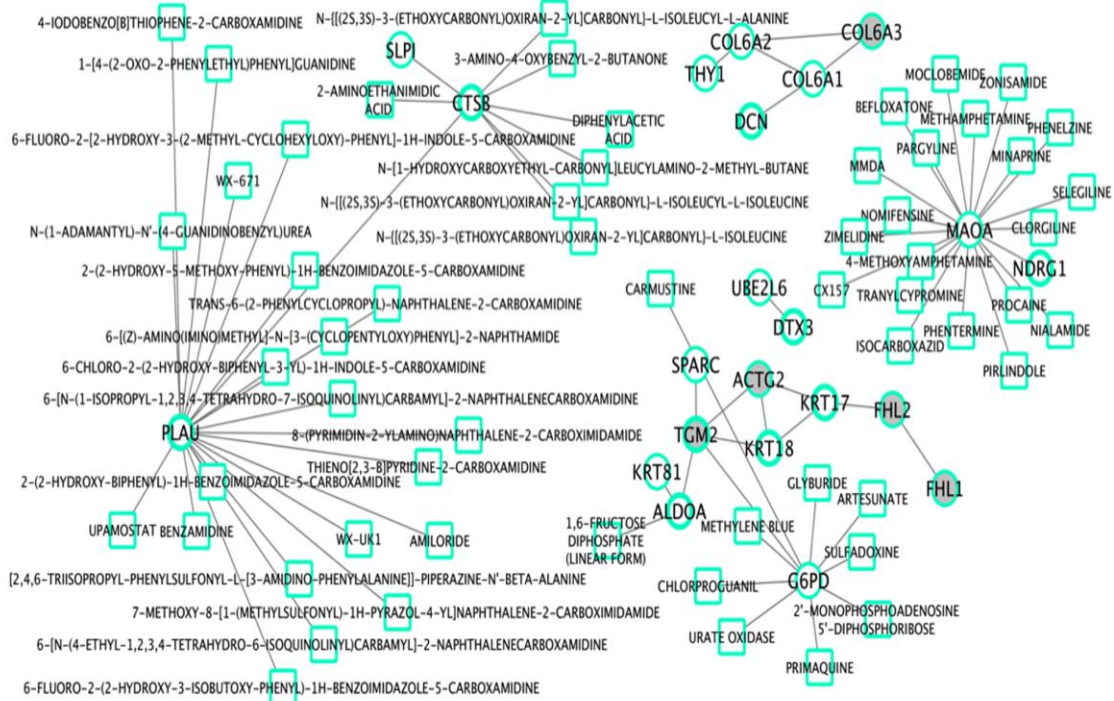

Proliferation Phenotype

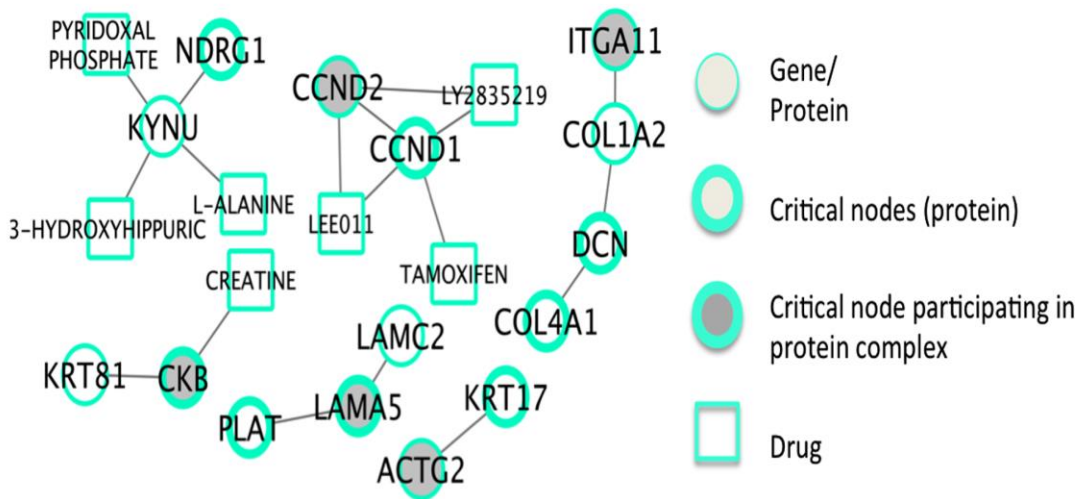

**SM Fig. 6. Drug repositioning networks.** For Tp and Pp drugs show experimentally verified interaction with genes.
